# Supplementary material
Source: PubMed Central journal article supplement (PMC2666598)
Supplement: M809498200_1.pdf [file M809498200_1.pdf]

## SUPPLEMENTAL DATA

### SUPPLEMENTAL FIGURE LEGENDS

**Fig. S1. Validation of PPAR $\gamma$  knockdown and Affymetrix microarray analysis.** *A.* 3T3-L1 cells 4 days after the initiation of differentiation were electroporated with control or different PPAR $\gamma$  siRNA oligonucleotides (1-4). After reseeding, cells were grown for 48 hours and assessed by phase contrast microscopy and processed for PPAR $\gamma_2$  mRNA expression. *B.* Confluent preadipocytes and control or PPAR $\gamma$  siRNA electroporated day 14 adipocytes were processed for protein and analyzed for PPAR $\gamma$  and RAN expression by immunoblotting. *C.* Correlation of mRNA expression values determined by Affymetrix microarray and qPCR.

**Fig. S2. Generation of an adenoviral GATA2 expression vector and validation of localized overexpression in epididymal adipose tissue *in vivo* by fat pad injections.** *A.* Subconfluent preadipocytes were infected with GFP or GATA2 expressing adenoviruses. 2 days after reaching confluency, GATA2 and RAN protein expression was analyzed. Cells were subjected to the differentiation protocol for 8 days and assessed for adipocyte conversion by phase contrast microscopy. *B.* GFP expression was localized in the whole fat pad 48h after injection.

SUPPLEMENTAL FIGURES

Schupp *et al.* Fig. S1

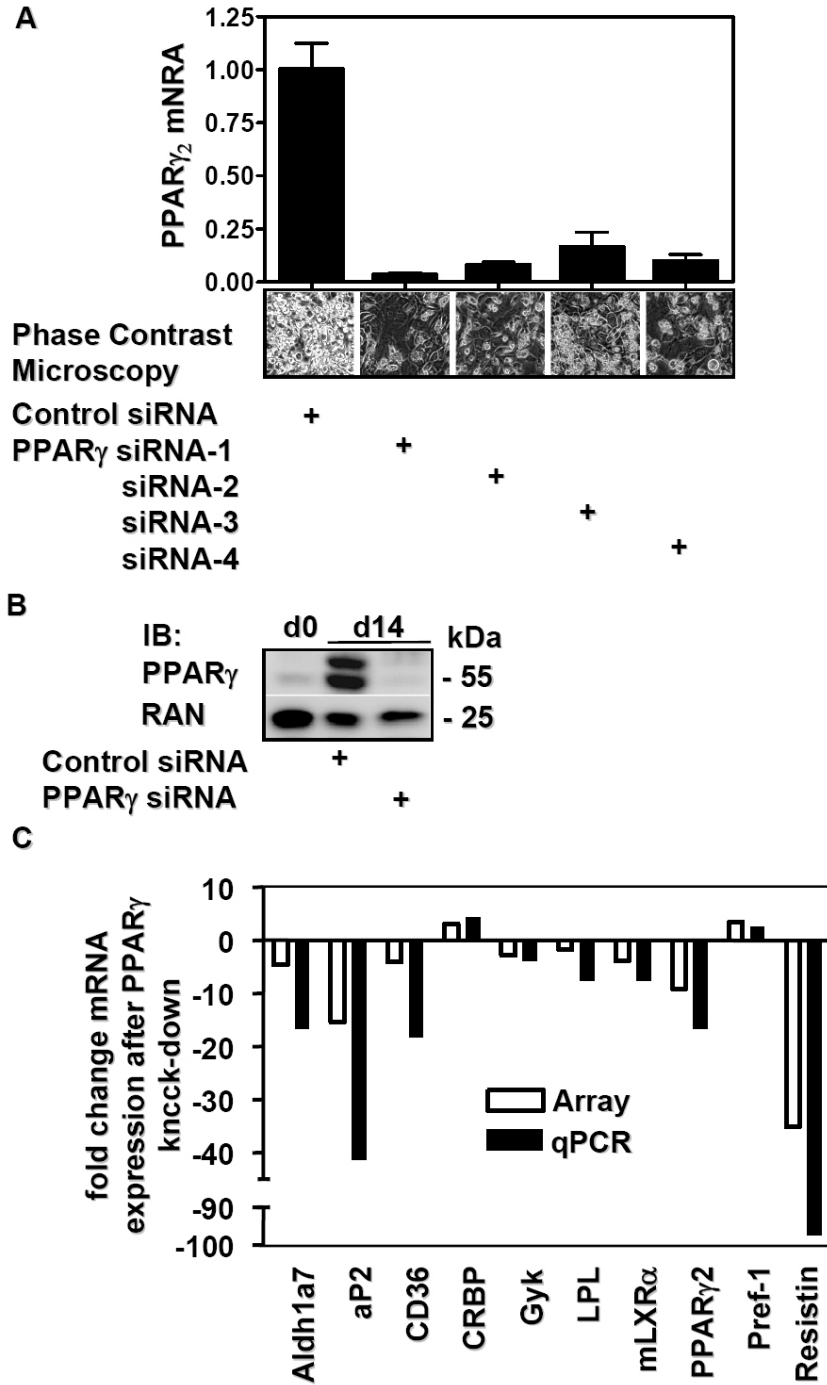



## SUPPLEMENTAL TABLES

**Table S1.** Primers, probes and siRNA oligonucleotides used in this study

|             |                                                                                                           |                                      |                       |
|-------------|-----------------------------------------------------------------------------------------------------------|--------------------------------------|-----------------------|
| <b>qPCR</b> | m36B4 fw                                                                                                  | TCATCCAGCAGGTGTTTGACA                |                       |
|             | m36B4 rv                                                                                                  | GGCACCGAGGCAACAGTT                   |                       |
|             | m36B4 probe                                                                                               | 6FAM-AGAGCAGGCCCTGCACTCTCG-TAMRA     |                       |
|             | maP2 fw                                                                                                   | TGGAAGACAGCTCCTCCTCG                 |                       |
|             | maP2 rv                                                                                                   | AATCCCCATTTACGCTGATGATC              |                       |
|             | maP2 probe                                                                                                | 6FAM-TGCCACAAGGAAAGTGGCAGGCA- TAMRA  |                       |
|             | mPPAR $\gamma_2$ fw                                                                                       | TGGGTGAAACTCTGGGAGATTC               |                       |
|             | mPPAR $\gamma_2$ rv                                                                                       | GAGAGGTCCACAGAGCTGATTCC              |                       |
|             | mPPAR $\gamma_2$ probe                                                                                    | 6FAM-CCCAGAGCATGGTGCCTTCGCTGT -TAMRA |                       |
|             | mGATA2, mCes3,<br>mMMP14, mAldh1a7,<br>mCD36, mCRBP,<br>mGyk, mLPL, mLXR $\alpha$ ,<br>mPref-1, mResistin | ASSAY ON DEMAND, ABI                 |                       |
|             | <b>siRNA</b>                                                                                              | PPAR $\gamma$ siRNA-1                | CAACAGGCCUCAUGAAGAAUU |
|             |                                                                                                           | PPAR $\gamma$ siRNA-2                | GACAUGAAUUCUUAUGAUU   |
|             |                                                                                                           | PPAR $\gamma$ siRNA-3                | GAAGAACCAUCCGAUUGAAUU |
|             |                                                                                                           | PPAR $\gamma$ siRNA-4                | CUGCAUCUCCACCUUAUUAUU |

**Table S2.** A. Reciprocal regulation of genes containing PPREs during differentiation and PPAR $\gamma$  knockdown  
 B. Genes differentially regulated in comparison to genes with PPREs sorted by fold change (FC) during differentiation.

**A**

**Selection of Genes with PPREs**

| Gene     | Diff.<br>FC | Kd<br>FC |
|----------|-------------|----------|
| G0s2     | 581.03      | -2.39    |
| Acsl1    | 154.76      | -17.6    |
| Cd36     | 86.45       | -4.18    |
| Pck1     | 84.87       | -67.24   |
| Cidea    | 68.09       | -57.37   |
| Lipe     | 48.59       | -9.29    |
| Fabp4    | 35.8        | -15.46   |
| Aqp7     | 18.18       | -13.87   |
| Sorbs1   | 15.19       | -2.34    |
| Serpine1 | 13.71       | -5.99    |

**B**

**Differentially regulated**

| Gene          | Diff.<br>FC | Kd<br>FC |
|---------------|-------------|----------|
| Ces3          | 52.10       | 1.26     |
| Cyp2c44       | 23.77       | 1.06     |
| Dapk1         | 22.34       | 1.01     |
| A030001D16Rik | 13.16       | 1.11     |
| Ndrp1         | 12.17       | 1.25     |
| Hfe           | 11.90       | 1.04     |
| Rorc          | 11.82       | 1.08     |
| Phkg1         | 11.22       | 2.18     |
| Acox2         | 10.56       | 1.30     |
| Ndr1          | 9.41        | 1.24     |
| Fbln1         | -11.48      | -1.14    |
| Ereg          | -9.17       | -1.01    |
| Smoc2         | -8.20       | -1.13    |
| Inmt          | -7.34       | -1.18    |
| Ltbp1         | -7.11       | -1.08    |
| A730054J21Rik | -6.10       | -1.03    |
| Ngfb          | -6.01       | -1.02    |
| Gata2         | -5.92       | -1.11    |
| Rhobtb3       | -5.26       | -1.05    |
| Ogt           | -5.26       | -1.05    |
